# Supplementary material for: Continental-Scale Microbiome Study Reveals Different Environmental Characteristics Determining Microbial Richness, Composition, and Quantity in Hotel Rooms
Source: PubMed Central journal article supplement (PMC7253364; doi:10.1128/msystems.00119-20), 2020-05-19

A

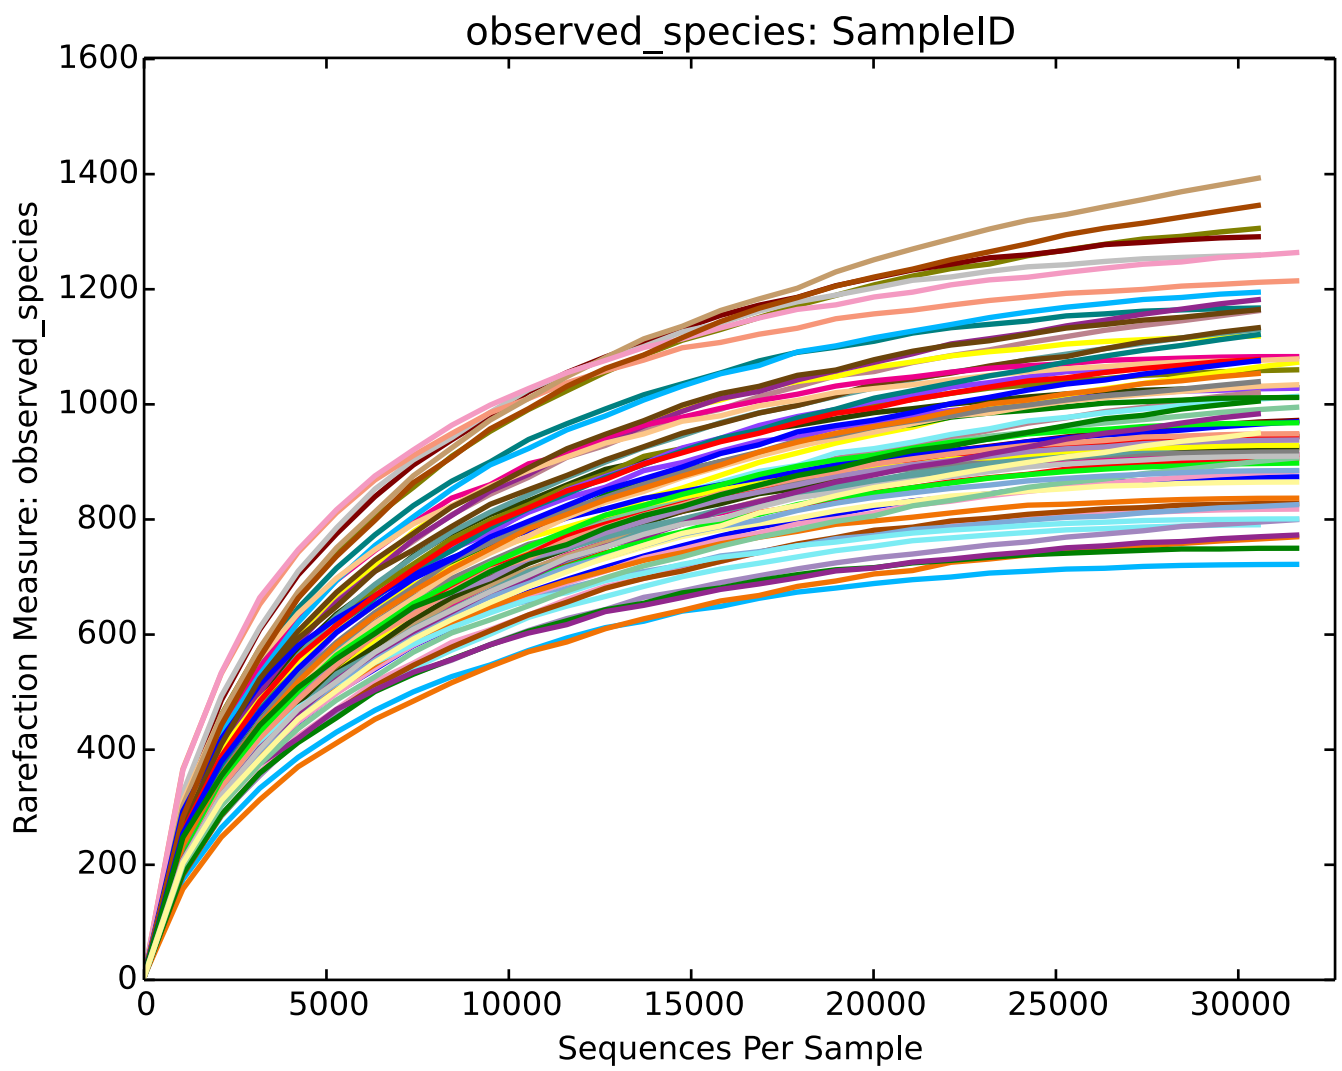

B

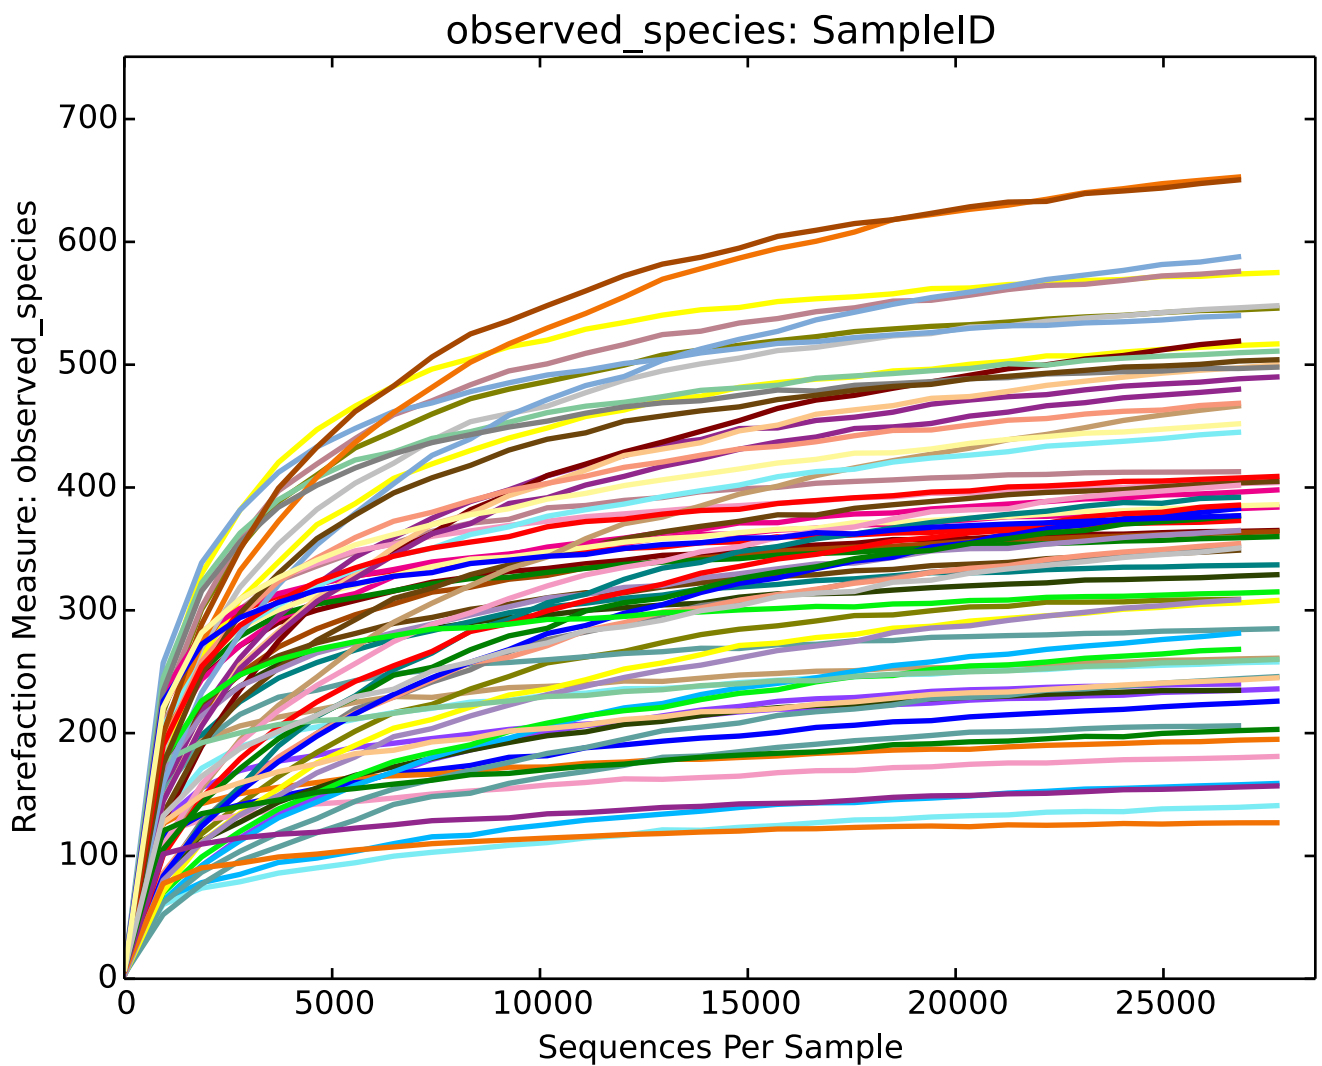

Supplement: mSystems.00119-20-sf002.pdf [file mSystems.00119-20-sf002.pdf]
